# Supplementary material for: Sinapine reduces non-alcoholic fatty liver disease in mice by modulating the composition of the gut microbiota
Source: Royal Society of Chemistry journal article supplement (doi:10.1039/c9fo00195f), 2019-01-01
Supplement: c9fo00195f1.pdf [file c9fo00195f1.pdf]

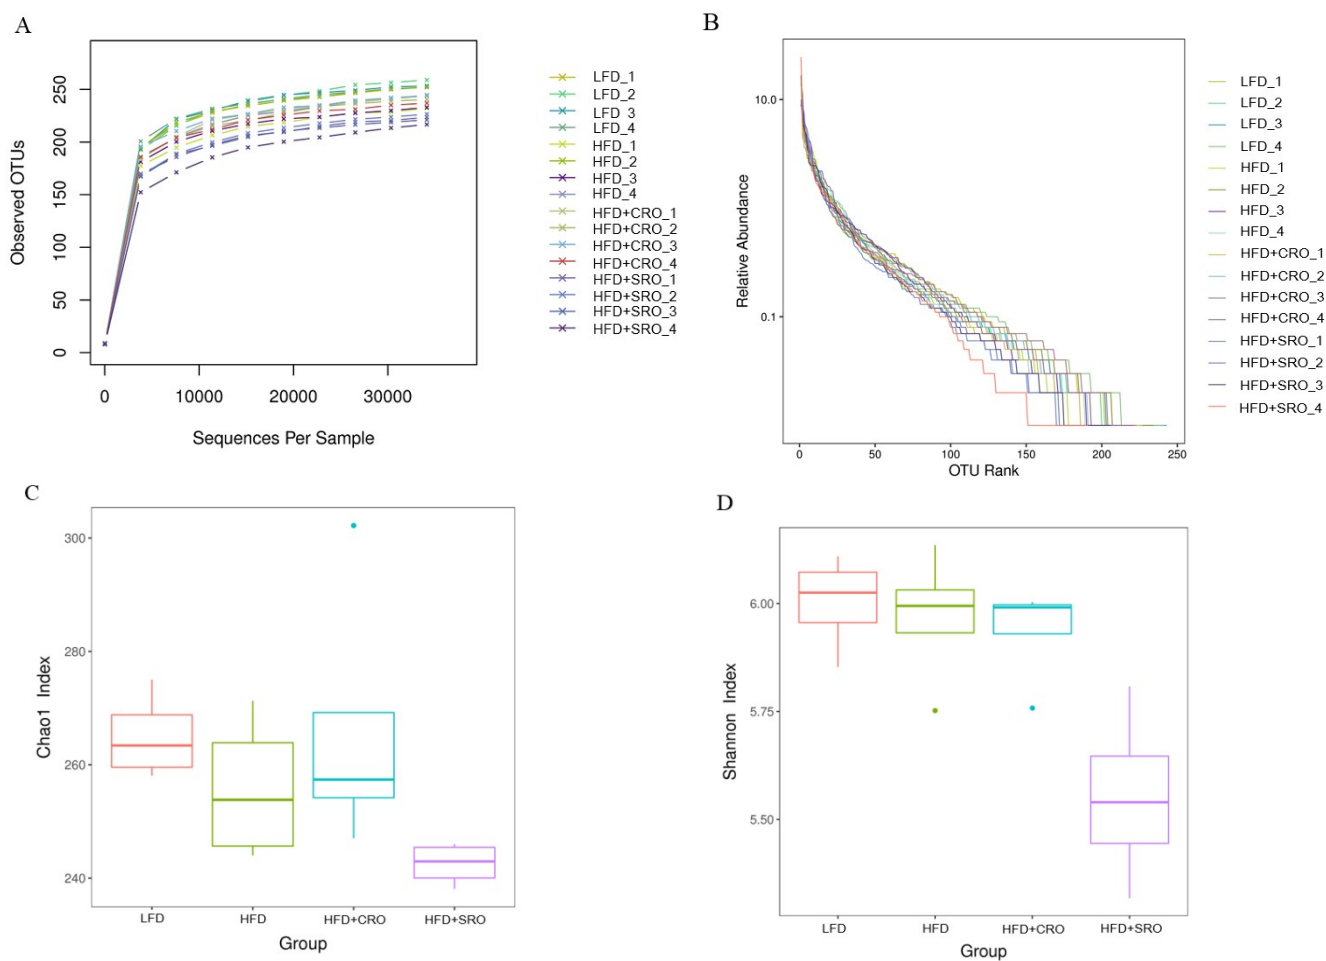

**Fig. S1.** Indices of bacterial diversity obtained from cecum contents samples (n=4). (A) Rarefaction curve; (B) Rank-Abundance; (C) Chao1 index; (D) Shannon index.

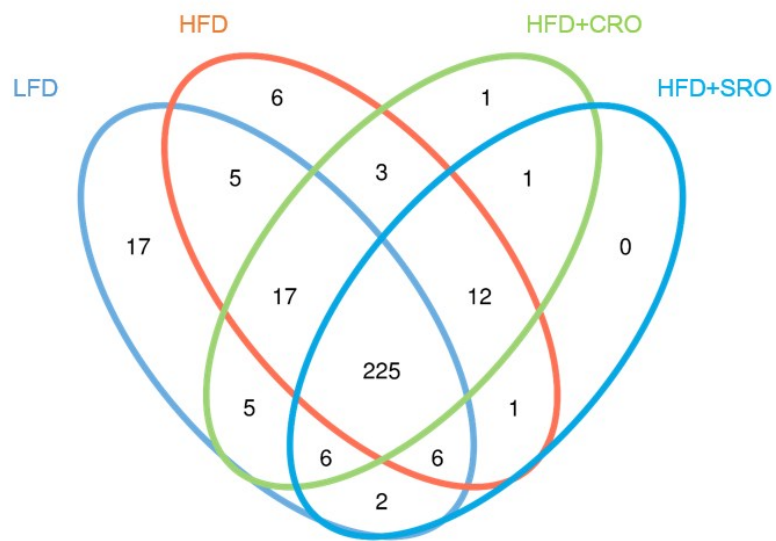

**Fig. S2.** Overlap and differences of gut microbiota in four groups. The plot was based on operational taxonomic unit (OTUs) detected in all samples.

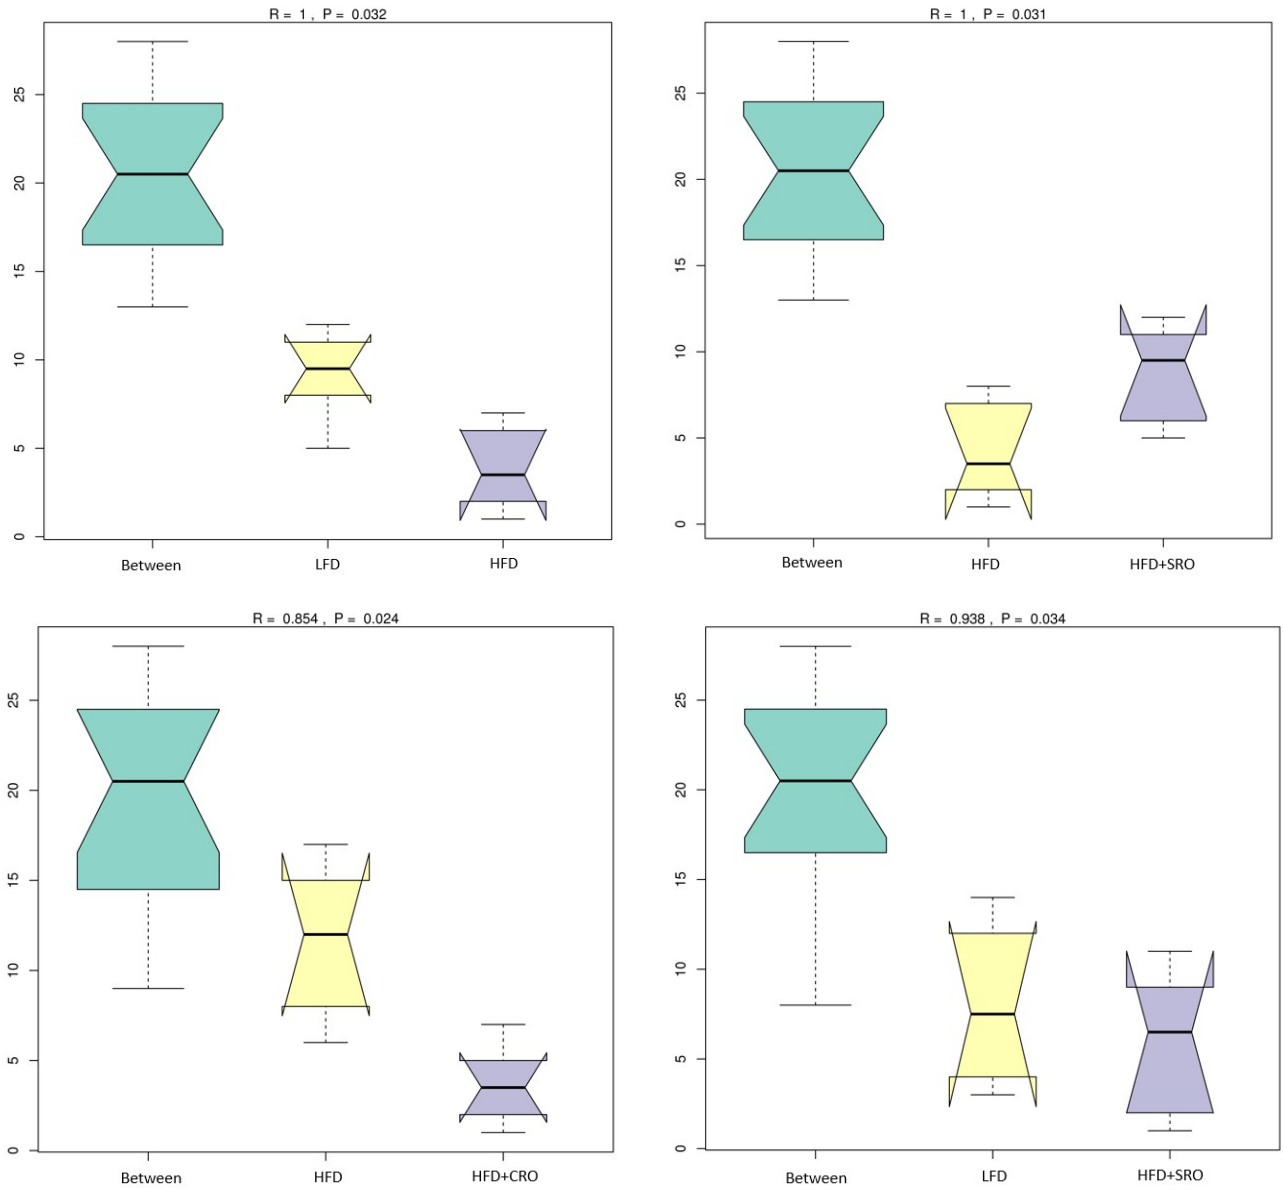

**Fig. S3.** Inter-group difference analysis by ANOSIM. A value of R close to 1 indicates that the difference between the groups is larger than the difference within the group, and  $P < 0.05$  indicates that the statistics are significant.

A

### Cladogram

- HFD
- LFD
- HFD+CRO
- HFD+SRO

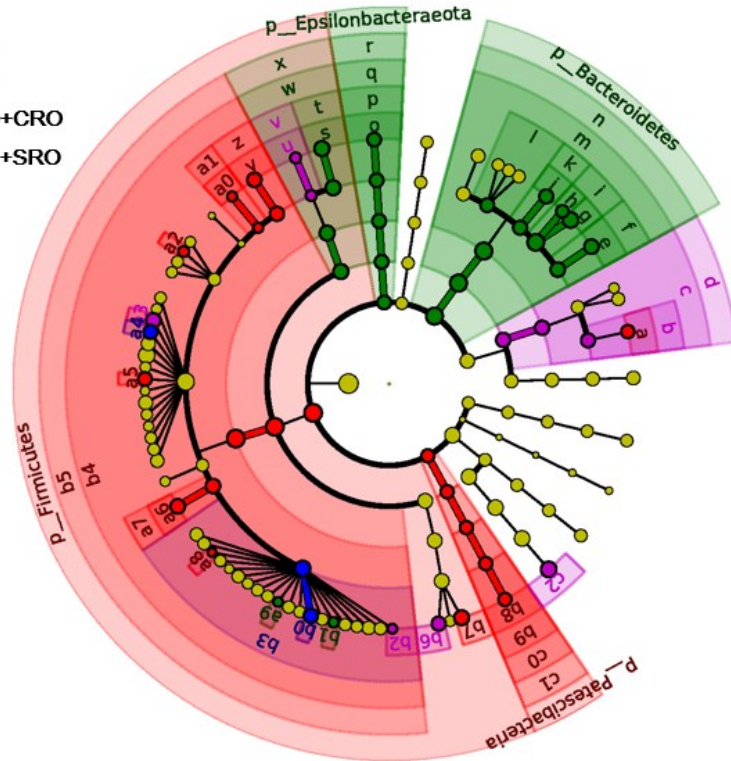

- a: g\_Coriobacteriaceae\_UCG\_002
- b: f\_Atopobiaceae
- c: o\_Coriobacteriales
- d: c\_Coriobacteria
- e: g\_Bacteroides
- f: f\_Bacteroidaceae
- g: g\_Ambiguous\_taxa
- h: g\_Muribaculum
- i: f\_Muribaculaceae
- j: g\_Alloprevotella
- k: f\_Prevotellaceae
- l: f\_Rikenellaceae
- m: o\_Bacteroidales
- n: c\_Bacteroidia
- o: g\_Helicobacter
- p: f\_Helicobacteraceae
- q: o\_Campylobacterales
- r: c\_Campylobacteria
- s: g\_Lactobacillus
- t: f\_Lactobacillaceae
- u: g\_Streptococcus
- v: f\_Streptococcaceae
- w: o\_Lactobacillales
- x: c\_Bacilli
- y: g\_Clostridium\_sensu\_stricto\_1
- z: f\_Clostridiaceae\_1
- a0: g\_Defluviitaleaceae\_UCG\_011
- a1: f\_Defluviitaleaceae
- a2: g\_Family\_XIII\_UCG\_001
- a3: g\_Blautia
- a4: g\_GCA\_900066575
- a5: g\_Lachnospiraceae\_UCG\_006
- a6: g\_Romboutsia
- a7: f\_Peptostreptococcaceae
- a8: g\_Candidatus\_Soleaferrea
- a9: g\_Ruminiclostridium\_1
- b0: g\_Ruminiclostridium\_9
- b1: g\_Ruminococcaceae\_UCG\_009
- b2: g\_UBA1819
- b3: f\_Ruminococcaceae
- b4: o\_Clostridiales
- b5: c\_Clostridia
- b6: g\_Dubosiella
- b7: g\_Faecalibaculum
- b8: g\_Candidatus\_Saccharimonas
- b9: f\_Saccharimonadaceae
- c0: o\_Saccharimonadales
- c1: c\_Saccharimonadia
- c2: g\_Desulfovibrio

B

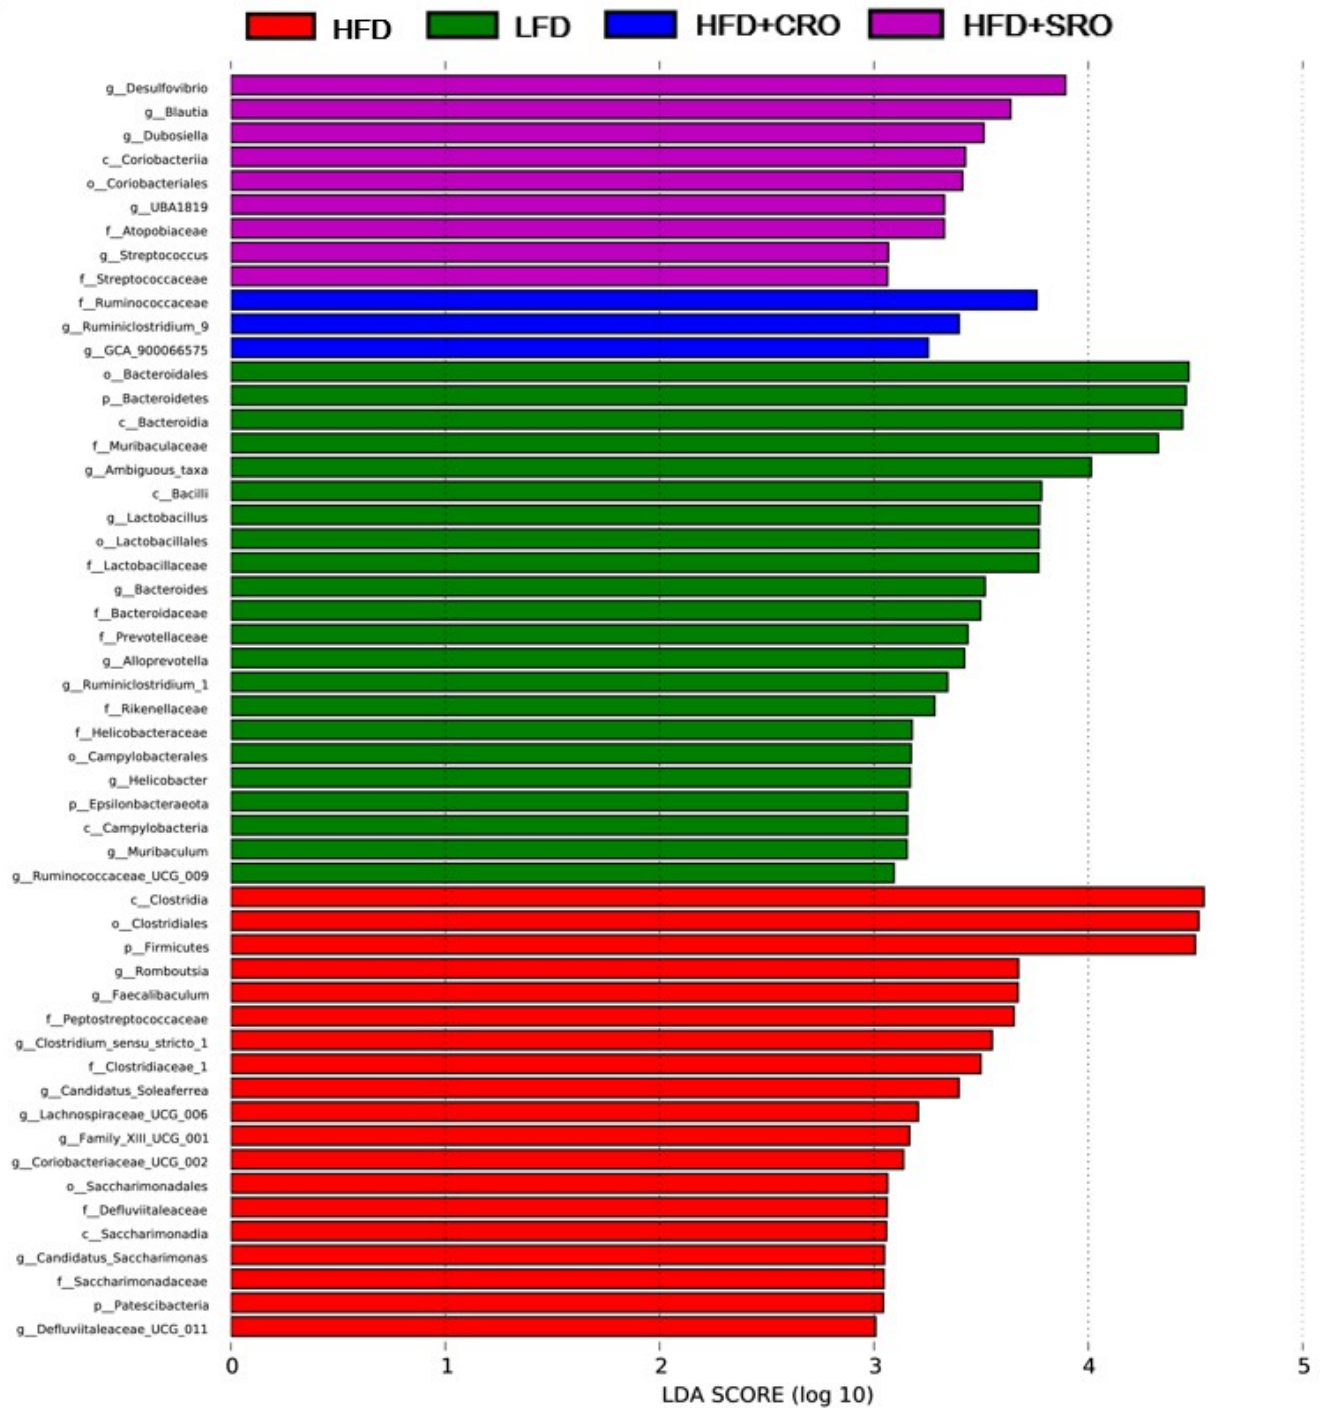

**Fig. S4.** LefSe analysis of key genera of gut microbiota in mice. (A) Taxonomic cladogram derived from LefSe analysis of 16S rRNA sequences. (B) LDA score plot of bacterial taxa with LDA scores higher than 3.

**Table S1**

The sequencing reads for the fecal microbiota.

| Sample    | Reads   | Nochimera | AvgLen (bp) | GC (%) |
|-----------|---------|-----------|-------------|--------|
| LFD_1     | 70982   | 47982     | 450.06      | 54.25  |
| LFD_2     | 80287   | 56755     | 452.82      | 54.57  |
| LFD_3     | 70229   | 48031     | 452.47      | 54.53  |
| LFD_4     | 62304   | 43991     | 449.78      | 54.46  |
| HFD_1     | 52509   | 45708     | 443.57      | 54.59  |
| HFD_2     | 63263   | 53635     | 444.34      | 54.43  |
| HFD_3     | 64538   | 52016     | 449.23      | 54.77  |
| HFD_4     | 62985   | 53958     | 445.35      | 54.92  |
| HFD+CRO_1 | 72244   | 46699     | 446.27      | 54.99  |
| HFD+CRO_2 | 70926   | 46487     | 446.75      | 54.55  |
| HFD+CRO_3 | 72419   | 51289     | 443.46      | 54.52  |
| HFD+CRO_4 | 68514   | 44962     | 446.06      | 54.3   |
| HFD+SRO_1 | 61599   | 41754     | 448.89      | 54.94  |
| HFD+SRO_2 | 63630   | 41201     | 447.95      | 55.04  |
| HFD+SRO_3 | 62204   | 41603     | 449.33      | 55.52  |
| HFD+SRO_4 | 62595   | 45894     | 444.74      | 55.28  |
| Total     | 1061228 |           |             |        |

**Table S2**

Statistics of OTU sequence numbers of each sample.

| OTU_ID | LFD_1 | LFD_2 | LFD_3 | LFD_4 | HFD_1 | HFD_2 | HFD_3 | HFD_4 | HFD+C | HFD+C | HFD+C | HFD+C | HFD+S | HFD+S | HFD+S | HFD+S |
|--------|-------|-------|-------|-------|-------|-------|-------|-------|-------|-------|-------|-------|-------|-------|-------|-------|
|        |       |       |       |       |       |       |       |       | RO_1  | RO_2  | RO_3  | RO_4  | RO_1  | RO_2  | RO_3  | RO_4  |
| OTU1   | 6026  | 2231  | 3771  | 5427  | 5339  | 1955  | 198   | 3245  | 195   | 155   | 104   | 75    | 5276  | 1455  | 3043  | 9312  |
| OTU2   | 917   | 1684  | 1566  | 1387  | 1359  | 904   | 1350  | 1400  | 3819  | 2958  | 2173  | 2584  | 4288  | 3239  | 6303  | 1799  |
| OTU3   | 1085  | 829   | 871   | 815   | 469   | 1110  | 1993  | 935   | 2148  | 2047  | 1085  | 1635  | 1504  | 2876  | 1897  | 1008  |
| OTU4   | 0     | 3     | 6     | 3     | 1     | 3363  | 304   | 2333  | 4147  | 2485  | 2973  | 3787  | 2     | 1341  | 928   | 2     |
| OTU5   | 500   | 3646  | 1285  | 842   | 1326  | 1224  | 3460  | 2171  | 811   | 299   | 158   | 221   | 817   | 245   | 951   | 392   |
| OTU9   | 0     | 4     | 25    | 1     | 32    | 2262  | 0     | 174   | 1817  | 3148  | 3625  | 2992  | 47    | 829   | 495   | 0     |
| OTU12  | 322   | 485   | 626   | 605   | 494   | 1227  | 2547  | 1751  | 716   | 840   | 261   | 428   | 891   | 856   | 1014  | 491   |
| OTU7   | 688   | 2851  | 4120  | 1338  | 315   | 74    | 57    | 197   | 129   | 44    | 7     | 225   | 2009  | 189   | 161   | 1149  |
| OTU18  | 483   | 857   | 503   | 306   | 1481  | 517   | 671   | 820   | 1010  | 735   | 786   | 606   | 1073  | 602   | 598   | 1459  |
| OTU6   | 1     | 1     | 1     | 0     | 1894  | 1072  | 1656  | 1540  | 1090  | 519   | 734   | 678   | 1295  | 437   | 266   | 935   |
| OTU11  | 67    | 88    | 47    | 89    | 495   | 1836  | 383   | 447   | 211   | 780   | 1867  | 382   | 154   | 3340  | 597   | 1298  |
| OTU15  | 0     | 2     | 25    | 42    | 1     | 1081  | 139   | 1178  | 1493  | 1786  | 2251  | 958   | 0     | 37    | 45    | 2     |
| OTU16  | 829   | 1038  | 1257  | 1155  | 0     | 0     | 0     | 1     | 711   | 2186  | 702   | 1417  | 0     | 0     | 0     | 0     |
| OTU27  | 1466  | 1762  | 2206  | 2133  | 24    | 195   | 215   | 48    | 0     | 2     | 3     | 0     | 203   | 294   | 254   | 41    |
| OTU17  | 413   | 194   | 210   | 1150  | 15    | 196   | 16    | 28    | 1642  | 600   | 771   | 1318  | 981   | 116   | 927   | 5     |
| OTU52  | 1667  | 1112  | 1546  | 1025  | 0     | 30    | 3     | 0     | 1     | 2     | 1     | 0     | 570   | 884   | 931   | 522   |
| OTU41  | 114   | 67    | 80    | 89    | 134   | 699   | 1700  | 368   | 755   | 1060  | 750   | 1222  | 263   | 276   | 230   | 84    |
| OTU14  | 3     | 0     | 0     | 0     | 1229  | 851   | 1893  | 412   | 1321  | 343   | 638   | 468   | 105   | 16    | 63    | 5     |
| OTU29  | 457   | 544   | 190   | 387   | 1801  | 455   | 216   | 805   | 243   | 231   | 319   | 442   | 336   | 193   | 344   | 420   |
| OTU13  | 193   | 1412  | 746   | 447   | 190   | 166   | 483   | 427   | 866   | 168   | 95    | 194   | 816   | 126   | 409   | 391   |
| OTU22  | 145   | 242   | 245   | 557   | 1926  | 783   | 327   | 531   | 66    | 292   | 240   | 141   | 144   | 386   | 154   | 825   |
| OTU10  | 4     | 4     | 2     | 10    | 192   | 1387  | 24    | 251   | 696   | 830   | 1417  | 314   | 270   | 430   | 64    | 713   |
| OTU91  | 1036  | 700   | 1032  | 725   | 0     | 0     | 0     | 0     | 355   | 315   | 85    | 328   | 406   | 658   | 561   | 466   |
| OTU56  | 1092  | 605   | 1072  | 678   | 0     | 1     | 0     | 1     | 351   | 316   | 109   | 362   | 384   | 693   | 576   | 440   |
| OTU50  | 169   | 129   | 178   | 238   | 133   | 321   | 502   | 188   | 630   | 956   | 1349  | 1079  | 167   | 145   | 146   | 58    |
| OTU48  | 696   | 504   | 746   | 544   | 94    | 224   | 633   | 223   | 161   | 322   | 149   | 184   | 220   | 329   | 340   | 164   |
